# Supplementary material for: Mitochondria-Targeted Catalase Does Not Suppress Development of Cellular Senescence during Aging
Source: MDPI journal article supplement (doi:10.3390/biomedicines12020414), 2024-02-10
Supplement: s1 [file Figure S1.pdf › Figure S1.pdf]

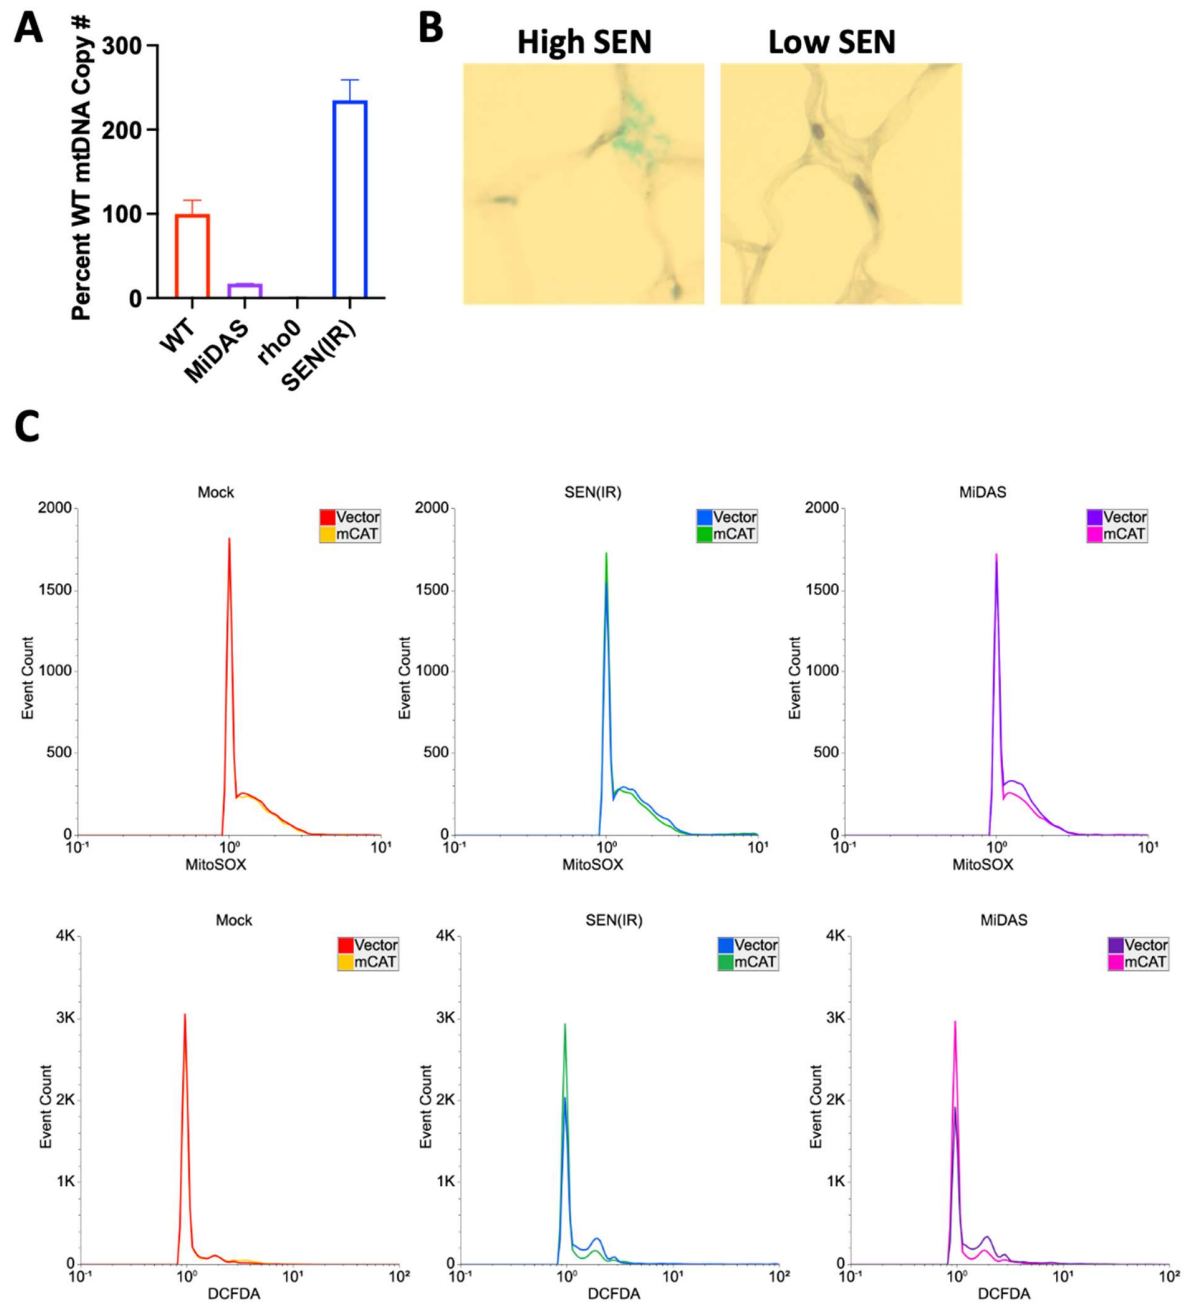

**Figure S1.** (A) Cells from Figure 1 were analyzed for mtDNA levels, normalized to nDNA and expressed as a percentage of WT. (B) Example of HMGB1 (IHC, dark nuclei) and senescence-associated beta-galactosidase (blue staining) in high and low senescence adipose tissue images. (C) Histograms of vector or mCAT-transduced Mock, SEN(IR), and MiDAS cells stained with MitoSOX or DCFDA (as in Figure 1A,B).
