# Supplementary material for: Mitochondria-Targeted Catalase Does Not Suppress Development of Cellular Senescence during Aging
Source: MDPI journal article supplement (doi:10.3390/biomedicines12020414), 2024-02-10
Supplement: s1 [file Table S1.xlsx]

## Sheet: Sheet1
Gene Assay	Forward Primer	Reverse Primer
Human
P21WAF1(CDKN1A)	5'- TCACTGTCTTGTACCCTTGTGC	5'- GGCGTTTGGAGTGGTAGAAA
MMP3	5’- CAAAACATATTTCTTTGTAGAGGACAA	5’- TTCAGCTATTTGCTTGGGAAA
IL1A	5’- GGTTGAGTTTAAGCCAATCCA	5’- TGCTGACCTAGGCTTGATGA
IL1B	5’- CTGTCCTGCGTGTTGAAAGA	5’- TTGGGTAATTTTTGGGATCTACA
IL6	5’- GCCCAGCTATGAACTCCTTCT	5’- GAAGGCAGCAGGCAACAC
IL8	5’- AGACAGCAGAGCACACAAGC	5’- ATGGTTCCTTCCGGTGGT
ACTB	Taqman Cat# 4333762T
Mouse
p21WAF1(Cdkn1a)	5'- TTGCCAGCAGAATAAAAGGTG	5'- TTTGCTCCTGTGCGGAAC
p16INK4a(Cdkn2a)	5'- AACTCTTTCGGTCGTACCCC	5'- TCCTCGCAGTTCGAATCTG
Il6	5’-GCTACCAAACTGGATATAATCAGGA	5’- CCAGGTAGCTATGGTACTCCAGAA
Il1b	5’- TGTAATGAAAGACGGCACACC	5’- TCTTCTTTGGGTATTGCTTGG
Il10	5’-AGCCGGGAAGACAATAACTG	5’-GCAGTCCGCAGCTCTAGG
Cxcl1	5'- TCCTGCATCCCCCATAGTTA	5'- CTTCAGGAACAGCCACCAGT
Ccl2	5’-CATCCACGTGTTGGCTCA	5’-GATCATCTTGCTGGTGAATGAGT
Tnf	5’- TCTTCTCATTCCTGCTTGTGG	5’- GGTCTGGGCCATAGAACTGA
Mmp3	5’-AAGGGTCTTCCGGTCCTG	5’-ATGCAATGGGTAGGATGAGC
Plau	5- GGAGCAGCTCATCTTGCAC	5'- CCCGTGCTGGTACGTATCTT
Serpine1	5'- CCCTCTACTTCAACGGCCAG	5'- GGGCGTGGTGAACTCAGTAT
Thbs2	5'- TTGTGGAAGGCGAATGCT	5'- AGACCAGCCCTCCTCACC
Alox5	5'- AGGCACGGCAAAAACAGTAT	5'- TGTGGCATTTGGCATCAATA
Ptges	5'- AGCACACTGCTGGTCATCAA	5'- CAGCCTCATCTGGCCTGT
Ptgs2	5'- GGGAGTCTGGAACATTGTGAA	5'- GTGCACATTGTAAGTAGGTGGACT
Actb	Taqman Cat# 4352341E
